# Supplementary material
Source: PubMed Central journal article supplement (PMC2729262)

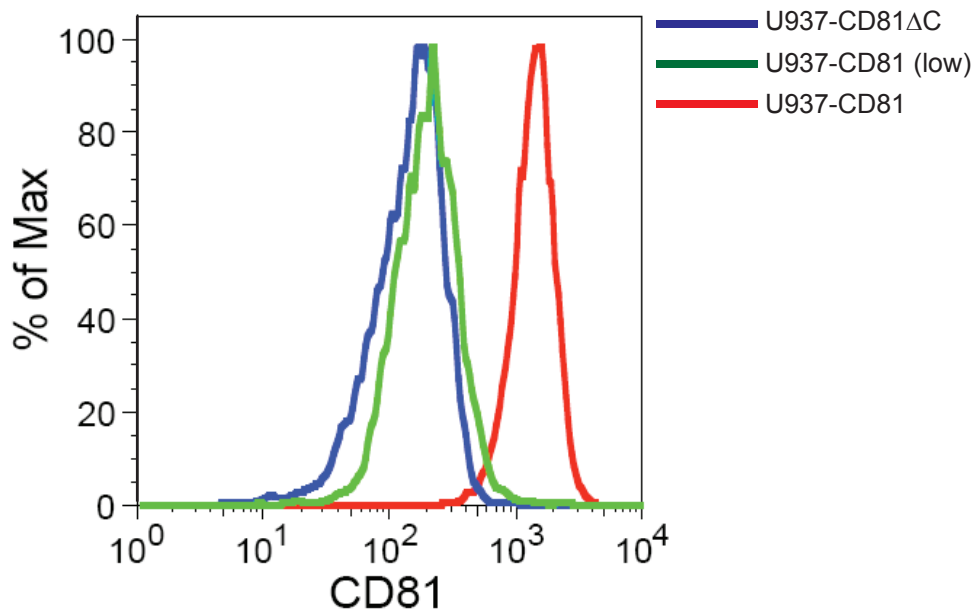

Supplement: supp_122_17_3137__1.pdf [file supp_122_17_3137__1.pdf]

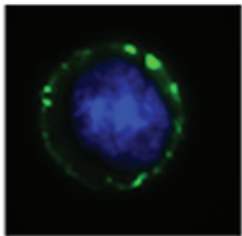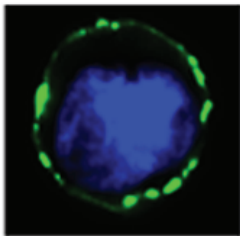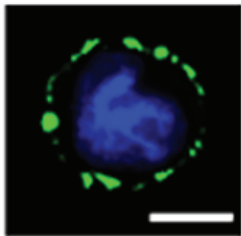

Supplement: supp_122_17_3137__2.pdf [file supp_122_17_3137__2.pdf]
